# Supplementary material for: Mulberry-like BiVO4 architectures: synthesis, characterization and their application in photocatalysis
Source: Royal Society of Chemistry journal article supplement (doi:10.1039/d1ce00374g), 2021-01-01
Supplement: d1ce00374g1.pdf [file d1ce00374g1.pdf]

## Supporting Information

### Mulberry-like $\text{BiVO}_4$ architectures: synthesis, characterization and their application in photocatalysis

Jiangang Wei, Xiaoyu Wang, Wenqin Li, Yihuai Li,\* Xiangrong Zhu, and LuPing Zhu\*

School of Environmental and Materials Engineering, Shanghai Engineering Research Center of Advanced Thermal Functional Materials, Shanghai Polytechnic University, Shanghai 201209, China

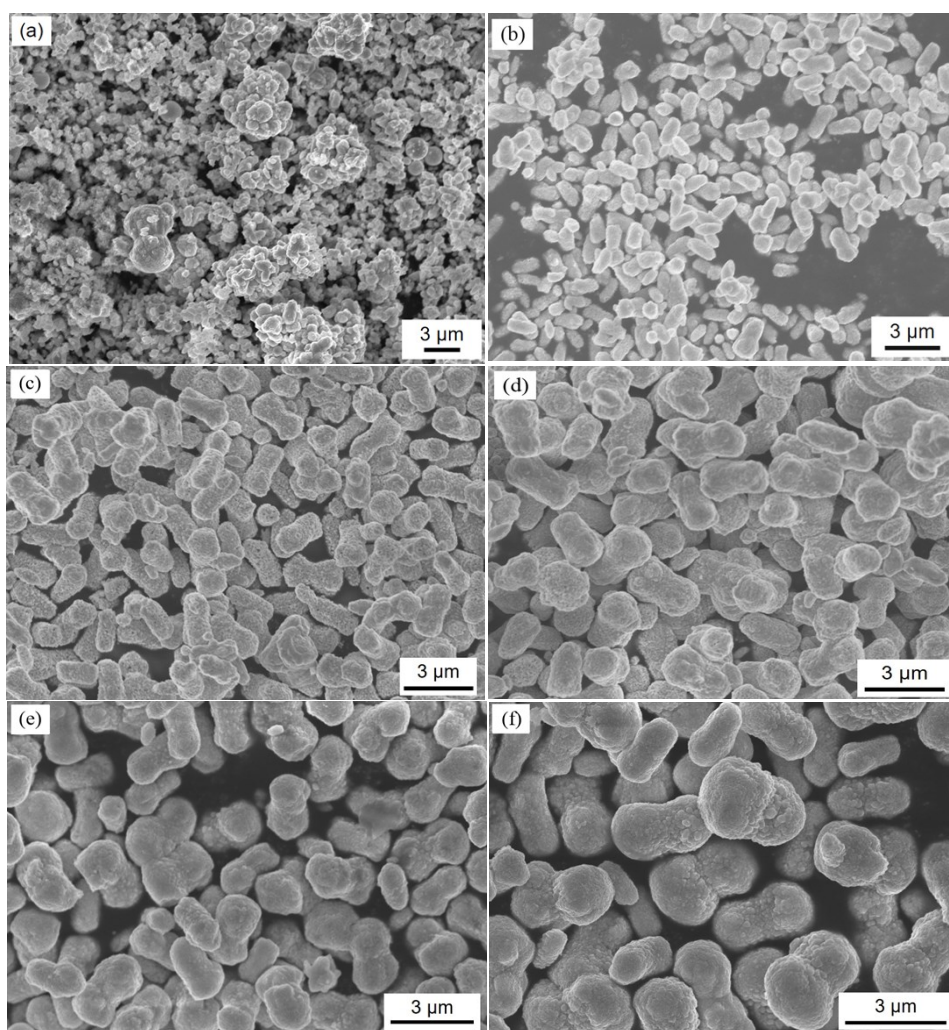

**Fig. S1.** SEM images of the as-synthesized  $\text{BiVO}_4$  samples: (a)  $R=0.25$ , (b)  $R=1$ , (c)  $R=2$ , (d)  $R=3$ , (e)  $R=4$ , and (f)  $R=5$ .

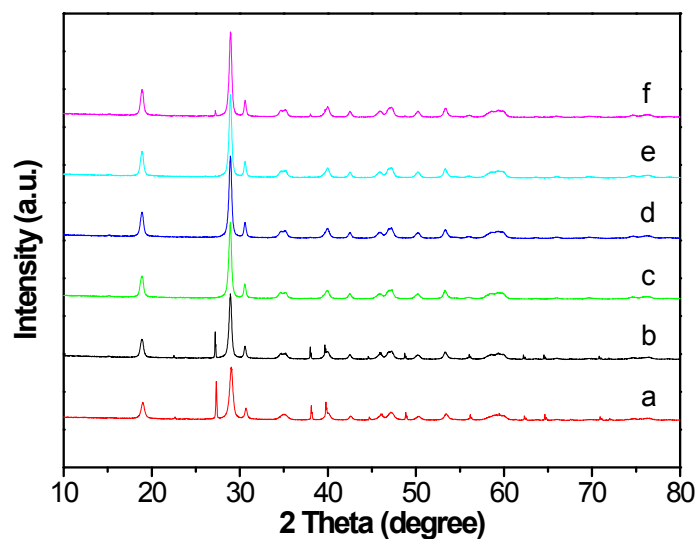

Fig. S2. XRD patterns of the as-synthesized BiVO<sub>4</sub> samples: (a) R=0.25, (b) R=1, (c) R=2, (d) R=3, (e) R=4, and (f) R=5.

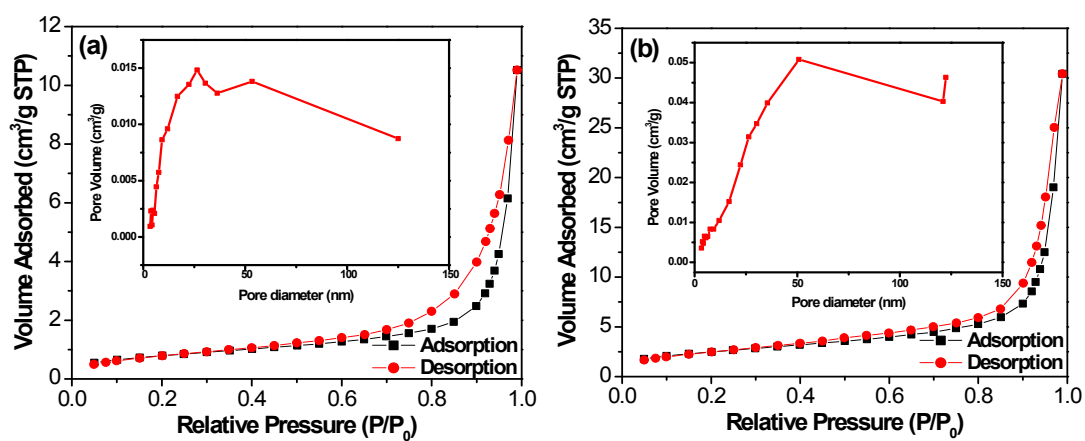

Figure S3. Typical N<sub>2</sub> gas adsorption-desorption isotherm of BiVO<sub>4</sub> samples: (a) R=3, (b) =5. Insets: the corresponding pore-size distribution.

**Fig. S4.** (a) The absorption spectra of MB solution in the presence of the BiVO<sub>4</sub> samples prepared at R = 0.5 at various durations, (b) the corresponding photodegradation rate of MB

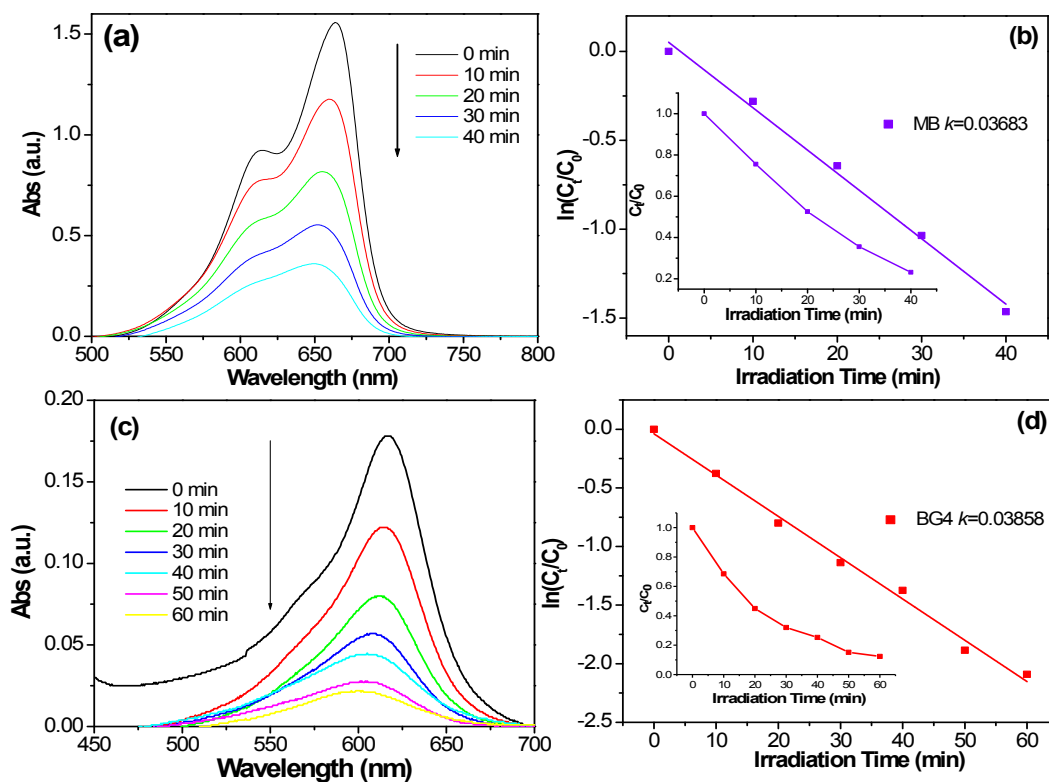

(Inset is the first-order kinetic plot), (c) the absorption spectra of BG4 solution in the presence of the BiVO<sub>4</sub> samples prepared at R = 0.5 at various durations, (d) the corresponding photodegradation rate of BG4 (Inset is the first-order kinetic plot).
